# Supplementary material for: Bacterial community assembly from cow teat skin to ripened cheeses is influenced by grazing systems
Source: PubMed Central journal article supplement (PMC5760519; doi:10.1038/s41598-017-18447-y), 2018-01-09
Supplement: 41598_2017_18447_MOESM1_ESM.pdf [file 41598_2017_18447_MOESM1_ESM.pdf]

# **Bacterial community assembly from cow teat skin to ripened cheeses is influenced by grazing systems**

Frétin Marie<sup>1,2</sup>, Martin Bruno<sup>2</sup>, Rifa Etienne<sup>1</sup>, Verdier-Metz Isabelle<sup>1</sup>, Pomiès Dominique<sup>2</sup>,  
Ferlay Anne<sup>2</sup>, Montel Marie-Christine<sup>1</sup>, Delbès Céline<sup>1\*</sup>

**Table S1.** Overall bacterial composition in teat skin and dairy product samples

|                        | Teat skin<br>( <i>n</i> =12) | Raw milk<br>( <i>n</i> =12) | Cheese core<br>( <i>n</i> =12) | Cheese rind<br>( <i>n</i> =12) |
|------------------------|------------------------------|-----------------------------|--------------------------------|--------------------------------|
| Total OTU              | 300                          | 112                         | 43                             | 75                             |
| Total number of genera | 98                           | 52                          | 14                             | 23                             |
| Total OTUs > 1%        | 18                           | 17                          | 1                              | 5                              |

*n*: number of samples by habitat

**Table S2.** Taxonomic distribution of isolates obtained from raw milk

| Phylum                               | Genus and/or species <sup>1</sup>        | July             |                   | September        |                   |
|--------------------------------------|------------------------------------------|------------------|-------------------|------------------|-------------------|
|                                      |                                          | EXT <sup>2</sup> | SEMI <sup>3</sup> | EXT <sup>2</sup> | SEMI <sup>3</sup> |
| <i>Actinobacteria</i><br>(32.4%)     | <i>Bifidobacterium crudilactis</i>       | 2                | 1                 | 1                |                   |
|                                      | <i>Gordonia sputi</i>                    |                  |                   |                  | 1                 |
|                                      | <i>Rhodococcus coprophilus</i>           |                  |                   |                  | 1                 |
|                                      | <i>Salana</i> sp.                        | 1                |                   |                  |                   |
|                                      | <i>Brachybacterium paraconglomeratum</i> | 1                |                   | 1                | 1                 |
|                                      | <i>Dermacoccus nishinomiyaensis</i>      |                  | 1                 | 1                | 1                 |
|                                      | <i>Curtobacterium flaccumfaciens</i>     |                  |                   |                  | 1                 |
|                                      | <i>Leifsonia aquatica</i>                |                  |                   | 1                |                   |
|                                      | <i>Microbacterium aurum</i>              |                  | 1                 |                  |                   |
|                                      | <i>Microbacterium flavum</i>             | 1                |                   | 1                |                   |
|                                      | <i>Microbacterium lacticum</i>           |                  | 2                 |                  | 2                 |
|                                      | <i>Microbacterium oxydans</i>            | 5                | 2                 | 2                | 1                 |
|                                      | <i>Microbacterium</i> sp.                |                  |                   |                  | 1                 |
|                                      | <i>Pseudoclavibacter helvolus</i>        |                  |                   | 2                |                   |
|                                      | <i>Kocuria carniphila</i>                | 1                | 1                 |                  |                   |
|                                      | <i>Kocuria palustris</i>                 |                  |                   | 2                | 1                 |
|                                      | <i>Kocuria rhizophila</i>                | 1                |                   |                  |                   |
| <i>Kocuria salsicia</i>              | 9                                        | 8                | 5                 | 3                |                   |
| <i>Propioniciclava</i> sp.           | 3                                        | 5                | 4                 | 4                |                   |
| Total for phylum                     | 24                                       | 21               | 20                | 17               |                   |
| <i>Bacteroidetes</i><br>(5.5%)       | <i>Chryseobacterium bovis</i>            | 1                |                   |                  | 1                 |
|                                      | <i>Chryseobacterium meningosepticum</i>  | 1                |                   |                  |                   |
|                                      | <i>Chryseobacterium oncorhynchi</i>      | 1                |                   |                  |                   |
|                                      | <i>Chryseobacterium shigense</i>         | 1                | 4                 |                  |                   |
|                                      | <i>Chryseobacterium</i> sp.              |                  | 1                 | 2                | 2                 |
|                                      | Total for phylum                         | 4                | 5                 | 2                | 3                 |
| <i>Deinococcus-Thermus</i><br>(1.2%) | <i>Deinococcus</i> sp.                   |                  |                   | 2                |                   |
|                                      | <i>Deinococcus xinjiangensis</i>         | 1                |                   |                  |                   |
|                                      | Total for phylum                         | 1                | 0                 | 2                | 0                 |
| <i>Firmicutes</i><br>(33.2%)         | <i>Bacillus cereus</i>                   | 2                |                   |                  |                   |
|                                      | <i>Bacillus pumilus</i>                  |                  |                   | 1                |                   |
|                                      | <i>Bacillus</i> sp.                      |                  | 2                 |                  |                   |
|                                      | <i>Macrococcus caseolyticus</i>          | 2                | 2                 |                  |                   |
|                                      | <i>Staphylococcus aureus</i>             | 2                | 1                 | 1                | 1                 |
|                                      | <i>Staphylococcus chromogenes</i>        | 3                | 2                 | 1                | 2                 |
|                                      | <i>Staphylococcus devriesei</i>          | 1                | 3                 | 3                |                   |
|                                      | <i>Staphylococcus haemolyticus</i>       | 4                | 2                 | 5                | 2                 |
|                                      | <i>Staphylococcus saprophyticus</i>      |                  | 1                 | 1                |                   |
|                                      | <i>Staphylococcus</i> sp.                | 1                | 1                 |                  |                   |
|                                      | <i>Aerococcus viridans</i>               |                  |                   |                  | 1                 |
|                                      | <i>Enterococcus faecium</i>              |                  |                   |                  | 2                 |
|                                      | <i>Enterococcus gilvus</i>               |                  |                   | 1                |                   |
|                                      | <i>Lactobacillus casei</i>               |                  | 5                 | 5                | 9                 |
|                                      | <i>Lactobacillus helveticus</i>          | 1                | 2                 | 3                | 1                 |
|                                      | <i>Lactobacillus parabuchneri</i>        |                  | 1                 | 1                |                   |
|                                      | <i>Lactobacillus paracasei</i>           |                  | 1                 |                  |                   |
| <i>Leuconostoc citreum</i>           | 1                                        |                  |                   |                  |                   |
| <i>Lactococcus lactis</i>            | 2                                        | 1                |                   |                  |                   |

|                                  |                                     |    |    |    |    |
|----------------------------------|-------------------------------------|----|----|----|----|
|                                  | <i>Streptococcus uberis</i>         |    |    |    | 1  |
|                                  | Total for phylum                    | 19 | 24 | 22 | 19 |
| <i>Proteobacteria</i><br>(27.7%) | <i>Brevundimonas aurantiaca</i>     | 2  |    |    |    |
|                                  | <i>Brevundimonas intermedia</i>     | 3  |    |    |    |
|                                  | <i>Brevundimonas nasdae</i>         |    | 1  |    |    |
|                                  | <i>Brevundimonas</i> sp.            | 4  | 4  | 1  | 3  |
|                                  | <i>Brevundimonas vesicularis</i>    | 2  | 2  |    | 1  |
|                                  | <i>Ochrobactrum rhizosphaerae</i>   | 1  | 1  |    | 1  |
|                                  | <u><i>Devosia</i> sp.</u>           |    | 1  |    |    |
|                                  | <i>Rhizobium radiobacter</i>        |    |    | 1  |    |
|                                  | <i>Rhizobium</i> sp.                |    | 1  |    |    |
|                                  | <u><i>Shinella zoogloeoides</i></u> | 2  |    |    |    |
|                                  | <i>Paracoccus yeei</i>              | 1  |    |    |    |
|                                  | <i>Sphingomonas melonis</i>         | 2  |    |    |    |
|                                  | <i>Sphingomonas</i> sp.             |    |    |    | 1  |
|                                  | <u><i>Variovorax paradoxus</i></u>  | 1  |    |    |    |
|                                  | <i>Escherichia coli</i>             | 1  |    |    |    |
|                                  | <i>Pseudomonas</i> sp.              |    |    |    | 1  |
|                                  | <i>Stenotrophomonas maltophilia</i> | 16 | 4  | 1  |    |
|                                  | <i>Stenotrophomonas rhizophila</i>  |    | 3  |    |    |
| <i>Stenotrophomonas</i> sp.      |                                     | 2  | 3  | 3  |    |
|                                  | Total for phylum                    | 35 | 19 | 6  | 10 |
| Total identified                 |                                     | 83 | 69 | 52 | 49 |

Values reported correspond to the number of clones identified from triplicate milk sample

<sup>1</sup> The underlined genera were not detected by 16S rRNA gene metabarcoding in raw milks

<sup>2</sup> EXT = extensive grazing system; <sup>3</sup>SEMI = semi-intensive grazing system

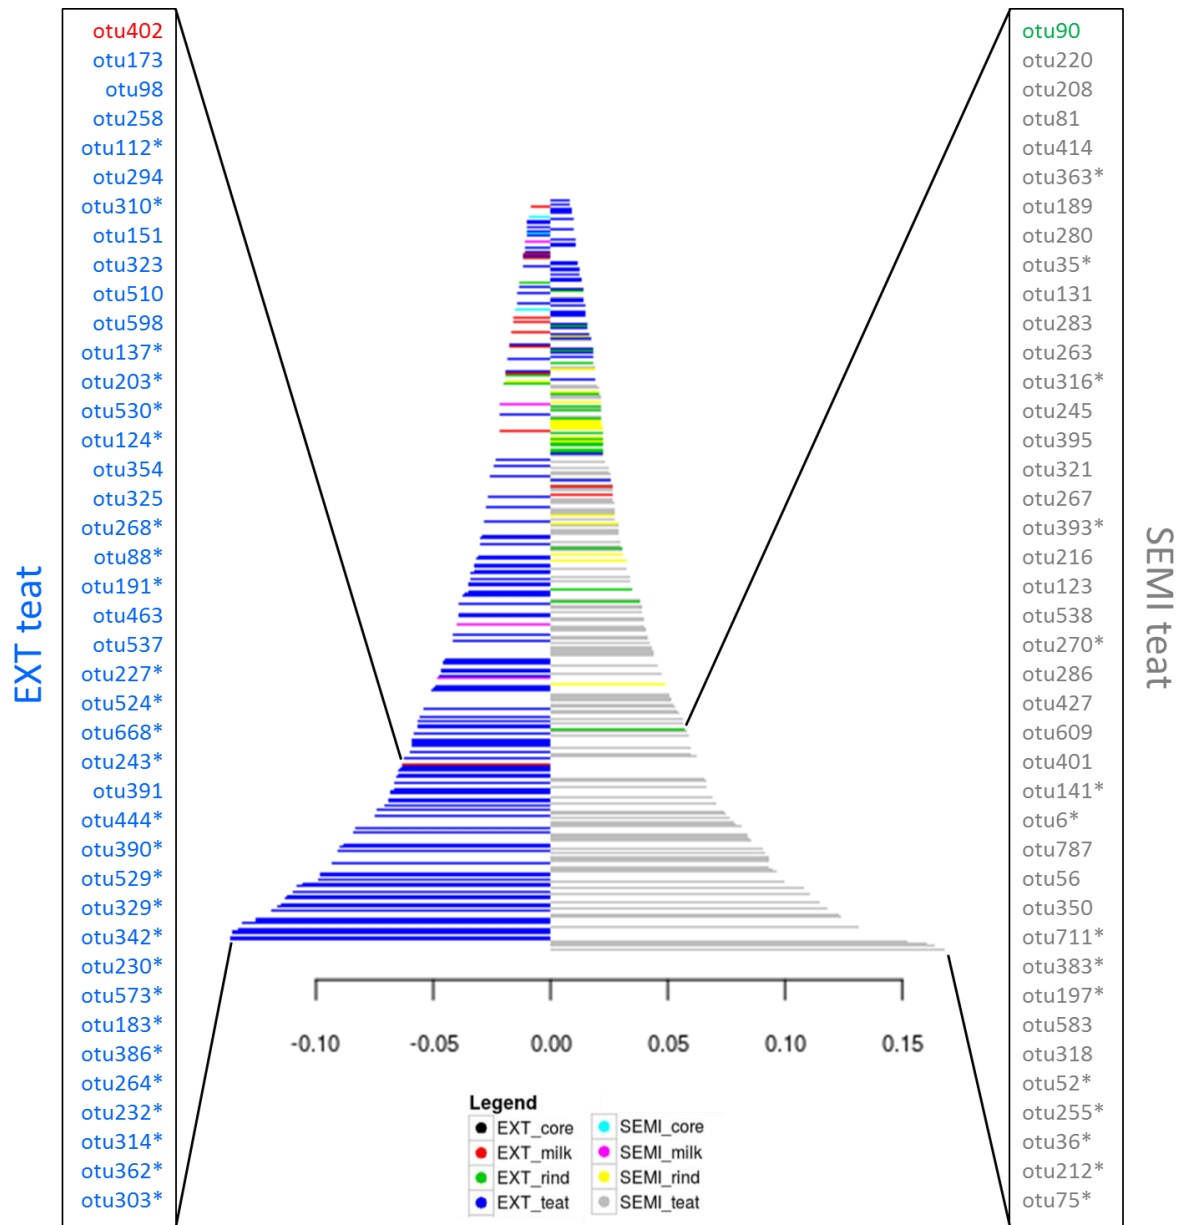

**Figure S1.** Contribution to PC3 of 365 variables of the PLS-DA performed on all the samples (teat skin swab, milk, cheese core and rind) of July. The 82 OTUs that contribute the most to PC3 were reported. The symbol \* indicates the OTUs with a differential abundance using LEfSe (Table S2 and S3).

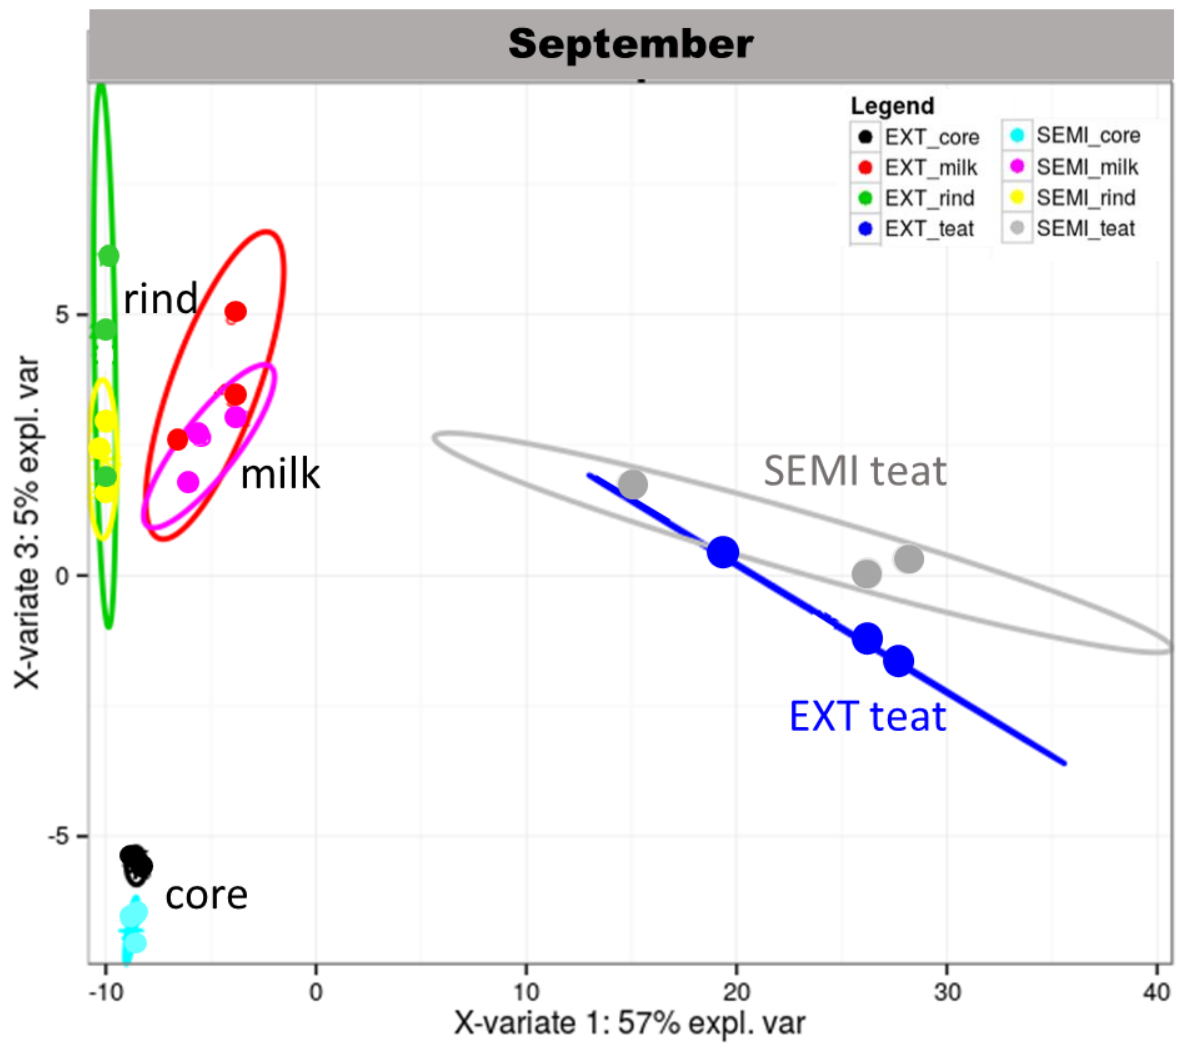

**Figure S2.** PLS-DA performed on the relative abundance of 365 OTUs found on all the samples of September from two grazing systems. Plot of sample distribution is projected on principal components 1 and 3.

**Table S3.** Differentially abundant taxa on teat skin in July between EXT ( $n=3$ ) and SEMI ( $n=3$ ) systems as determined by the LDA method<sup>1</sup>.

| Notation on Fig. 2A              | Taxa                                                                                     | N°OTU         | Average abundance |       | Standard deviation |      | LDA score | pval   |
|----------------------------------|------------------------------------------------------------------------------------------|---------------|-------------------|-------|--------------------|------|-----------|--------|
|                                  |                                                                                          |               | EXT               | SEMI  | EXT                | SEMI |           |        |
| <b>Taxa more abundant in EXT</b> |                                                                                          |               |                   |       |                    |      |           |        |
|                                  | <b><i>Actinobacteria</i></b>                                                             |               |                   |       |                    |      |           |        |
| f                                | Actinobacteria Corynebacteriales Corynebacteriaceae Corynebacterium Corynebacterium spp. | OTU12         | 3.95              | 0.96  | 2.23               | 0.26 | 4.166     | 0.0495 |
| g                                | Actinobacteria Corynebacteriales Corynebacteriaceae Corynebacterium                      | <b>OTU137</b> | 0.27              | 0.02  | 0.18               | 0.02 | 3.119     | 0.0495 |
| h                                | Actinobacteria Corynebacteriales Corynebacteriaceae Corynebacterium                      | <b>OTU183</b> | 0.19              | -     | 0.24               | -    | 3.096     | 0.0369 |
| i                                | Actinobacteria Corynebacteriales Corynebacteriaceae Corynebacterium                      | <b>OTU444</b> | 0.09              | <0.01 | 0.06               | 0.00 | 2.713     | 0.0463 |
|                                  | Coriobacteriia                                                                           | class         | 1.72              | 0.60  | 0.66               | 0.17 | 4.242     | 0.0495 |
|                                  | Coriobacteriia Coriobacteriales                                                          | order         | 1.72              | 0.60  | 0.66               | 0.17 | 4.198     | 0.0495 |
| r                                | Coriobacteriia Coriobacteriales Coriobacteriaceae                                        | family        | 1.72              | 0.60  | 0.66               | 0.17 | 3.763     | 0.0495 |
| k                                | Coriobacteriia Coriobacteriales Coriobacteriaceae Atopobium                              | genus         | 1.53              | 0.46  | 0.70               | 0.15 | 3.742     | 0.0495 |
| l                                | Coriobacteriia Coriobacteriales Coriobacteriaceae Atopobium                              | <b>OTU112</b> | 0.67              | 0.05  | 0.36               | 0.03 | 3.512     | 0.0495 |
| m                                | Coriobacteriia Coriobacteriales Coriobacteriaceae Atopobium                              | <b>OTU124</b> | 0.36              | 0.05  | 0.19               | 0.07 | 3.207     | 0.0495 |
| n                                | Coriobacteriia Coriobacteriales Coriobacteriaceae Atopobium                              | OTU130        | 0.35              | 0.11  | 0.23               | 0.04 | 3.096     | 0.0495 |
| q                                | Coriobacteriia Coriobacteriales Coriobacteriaceae Gordonibacter                          | <b>OTU329</b> | 0.07              | 0.01  | 0.03               | 0.01 | 2.945     | 0.0495 |
|                                  | <b><i>Firmicutes</i></b>                                                                 |               |                   |       |                    |      |           |        |
| u                                | Bacilli Bacillales Planococcaceae Solibacillus                                           | OTU205        | 0.10              | 0.06  | 0.01               | 0.04 | 2.760     | 0.0495 |
| x                                | Bacilli Lactobacillales Aerococcaceae Aerococcus                                         | genus         | 2.39              | 0.41  | 2.54               | 0.19 | 3.982     | 0.0495 |
| y                                | Clostridia Clostridiales Christensenellaceae                                             | OTU146        | 0.50              | 0.07  | 0.22               | 0.06 | 3.366     | 0.0495 |
| z                                | Clostridia Clostridiales Christensenellaceae                                             | OTU193        | 0.10              | 0.02  | 0.03               | 0.01 | 2.797     | 0.0495 |
| a0                               | Clostridia Clostridiales Christensenellaceae                                             | <b>OTU227</b> | 0.09              | 0.01  | 0.05               | 0.00 | 2.655     | 0.0495 |
| a1                               | Clostridia Clostridiales Christensenellaceae                                             | OTU258        | 0.21              | 0.03  | 0.13               | 0.03 | 2.959     | 0.0495 |
| a2                               | Clostridia Clostridiales Christensenellaceae                                             | <b>OTU268</b> | 0.08              | 0.01  | 0.05               | 0.01 | 2.688     | 0.0495 |
| a3                               | Clostridia Clostridiales Christensenellaceae                                             | OTU285        | 0.28              | 0.03  | 0.23               | 0.02 | 3.119     | 0.0495 |
| a4                               | Clostridia Clostridiales Christensenellaceae                                             | <b>OTU303</b> | 0.09              | -     | 0.01               | -    | 2.962     | 0.0369 |
| a5                               | Clostridia Clostridiales Christensenellaceae                                             | <b>OTU390</b> | 0.15              | <0.01 | 0.17               | 0.01 | 2.879     | 0.0463 |
| a6                               | Clostridia Clostridiales Christensenellaceae                                             | OTU398        | 0.06              | 0.02  | 0.02               | 0.00 | 2.936     | 0.0495 |

|    |                                                                       |               |      |       |      |      |       |        |
|----|-----------------------------------------------------------------------|---------------|------|-------|------|------|-------|--------|
| a7 | Clostridia Clostridiales Christensenellaceae                          | OTU402        | 0.09 | 0.02  | 0.05 | 0.01 | 2.670 | 0.0495 |
| a8 | Clostridia Clostridiales Christensenellaceae                          | <b>OTU530</b> | 0.06 | 0.01  | 0.05 | 0.00 | 2.525 | 0.0495 |
| b3 | Clostridia Clostridiales Family XIII                                  | family        | 0.30 | 0.07  | 0.16 | 0.04 | 3.108 | 0.0495 |
| b2 | Clostridia Clostridiales Family XIII Mogibacterium                    | OTU135        | 0.30 | 0.07  | 0.16 | 0.04 | 3.096 | 0.0495 |
| c1 | Clostridia Clostridiales Lachnospiraceae                              | family        | 4.63 | 1.47  | 2.51 | 0.68 | 4.213 | 0.0495 |
| d1 | Clostridia Clostridiales Lachnospiraceae                              | <b>OTU88</b>  | 0.56 | 0.04  | 0.22 | 0.05 | 3.428 | 0.0495 |
| c2 | Clostridia Clostridiales Lachnospiraceae                              | OTU156        | 0.15 | 0.02  | 0.12 | 0.01 | 2.859 | 0.0495 |
| c3 | Clostridia Clostridiales Lachnospiraceae                              | OTU181        | 0.13 | 0.04  | 0.04 | 0.02 | 2.743 | 0.0495 |
| c4 | Clostridia Clostridiales Lachnospiraceae                              | <b>OTU203</b> | 0.27 | 0.03  | 0.16 | 0.01 | 3.106 | 0.0495 |
| c5 | Clostridia Clostridiales Lachnospiraceae                              | <b>OTU232</b> | 0.04 | -     | 0.01 | -    | 2.951 | 0.0369 |
| c6 | Clostridia Clostridiales Lachnospiraceae                              | <b>OTU243</b> | 0.10 | 0.01  | 0.05 | 0.01 | 2.730 | 0.0495 |
| c8 | Clostridia Clostridiales Lachnospiraceae                              | OTU313        | 0.08 | 0.01  | 0.02 | 0.01 | 2.725 | 0.0495 |
| c9 | Clostridia Clostridiales Lachnospiraceae                              | <b>OTU362</b> | 0.08 | <0.01 | 0.00 | 0.00 | 2.945 | 0.0463 |
| d0 | Clostridia Clostridiales Lachnospiraceae                              | <b>OTU529</b> | 0.05 | <0.01 | 0.02 | 0.01 | 2.858 | 0.0495 |
| b4 | Clostridia Clostridiales Lachnospiraceae Acetitomaculum               |               | 1.25 | 0.11  | 0.65 | 0.04 | 3.796 | 0.0495 |
| b7 | Clostridia Clostridiales Lachnospiraceae Acetitomaculum               | OTU37         | 0.97 | 0.08  | 0.56 | 0.04 | 3.637 | 0.0495 |
| b5 | Clostridia Clostridiales Lachnospiraceae Acetitomaculum               | <b>OTU264</b> | 0.09 | <0.01 | 0.04 | 0.00 | 2.725 | 0.0463 |
| b6 | Clostridia Clostridiales Lachnospiraceae Acetitomaculum               | <b>OTU314</b> | 0.07 | <0.01 | 0.01 | 0.00 | 2.863 | 0.0463 |
| b8 | Clostridia Clostridiales Lachnospiraceae Acetitomaculum               | <b>OTU573</b> | 0.05 | -     | 0.03 | -    | 2.529 | 0.0369 |
| c0 | Clostridia Clostridiales Lachnospiraceae Coproccoccus                 | <b>OTU191</b> | 0.19 | 0.02  | 0.08 | 0.02 | 2.984 | 0.0495 |
| d5 | Clostridia Clostridiales Ruminococcaceae                              | <b>OTU230</b> | 0.09 | <0.01 | 0.01 | 0.01 | 2.991 | 0.0463 |
| d6 | Clostridia Clostridiales Ruminococcaceae                              | <b>OTU310</b> | 0.13 | 0.02  | 0.11 | 0.01 | 2.784 | 0.0495 |
| d7 | Clostridia Clostridiales Ruminococcaceae                              | <b>OTU342</b> | 0.09 | <0.01 | 0.04 | 0.01 | 2.727 | 0.0463 |
| d9 | Clostridia Clostridiales Ruminococcaceae                              | <b>OTU668</b> | 0.07 | <0.01 | 0.08 | 0.01 | 2.594 | 0.0463 |
| d3 | Clostridia Clostridiales Ruminococcaceae Ruminiclostridium            | <b>OTU524</b> | 0.09 | 0.01  | 0.09 | 0.01 | 2.748 | 0.0463 |
| d4 | Clostridia Clostridiales Ruminococcaceae Saccharofermentans           | OTU356        | 0.16 | 0.04  | 0.04 | 0.00 | 2.871 | 0.0495 |
| e0 | Erysipelotrichia Erysipelotrichales Erysipelotrichaceae Solobacterium | <b>OTU386</b> | 0.05 | <0.01 | 0.03 | 0.00 | 2.709 | 0.0463 |

Taxa more abundant in SEMI

|   |                                                     |        |      |      |      |      |       |        |
|---|-----------------------------------------------------|--------|------|------|------|------|-------|--------|
|   | <b><i>Actinobacteria</i></b>                        |        |      |      |      |      |       |        |
|   | Actinobacteria Bifidobacteriales                    | order  | 0.48 | 10.5 | 0.59 | 5.69 | 4.694 | 0.0495 |
| e | Actinobacteria Bifidobacteriales Bifidobacteriaceae | family | 0.48 | 10.5 | 0.59 | 5.69 | 4.675 | 0.0495 |



|                          |                                                                                    |               |       |      |      |      |       |        |
|--------------------------|------------------------------------------------------------------------------------|---------------|-------|------|------|------|-------|--------|
| d                        | Actinobacteria Bifidobacteriales Bifidobacteriaceae Bifidobacterium                | genus         | 0.48  | 10.5 | 0.59 | 5.69 | 4.674 | 0.0495 |
| c                        | Actinobacteria Bifidobacteriales Bifidobacteriaceae Bifidobacterium B.pseudolongum | <b>OTU6</b>   | 0.46  | 9.90 | 0.58 | 5.46 | 4.640 | 0.0495 |
| a                        | Actinobacteria Bifidobacteriales Bifidobacteriaceae Bifidobacterium B.choerinum    | <b>OTU36</b>  | <0.01 | 0.34 | 0.00 | 0.30 | 3.238 | 0.0495 |
| b                        | Actinobacteria Bifidobacteriales Bifidobacteriaceae Bifidobacterium B.merycicum    | <b>OTU52</b>  | 0.02  | 0.27 | 0.01 | 0.07 | 3.118 | 0.0495 |
| j                        | Actinobacteria Propionibacteriales Nocardioidaceae                                 | <b>OTU363</b> | 0.02  | 0.06 | 0.00 | 0.07 | 3.107 | 0.0495 |
| p                        | Coriobacteria Coriobacteriales Coriobacteriaceae Atopobium                         | <b>OTU75</b>  | -     | 0.15 | -    | 0.02 | 3.033 | 0.0369 |
| o                        | Coriobacteria Coriobacteriales Coriobacteriaceae Atopobium                         | <b>OTU212</b> | -     | 0.04 | -    | 0.02 | 3.026 | 0.0369 |
| <hr/>                    |                                                                                    |               |       |      |      |      |       |        |
| <b><i>Firmicutes</i></b> |                                                                                    |               |       |      |      |      |       |        |
| s                        | Bacilli Bacillales Bacillaceae Bacillus                                            | <b>OTU141</b> | 0.06  | 0.49 | 0.03 | 0.33 | 3.362 | 0.0495 |
| t                        | Bacilli Bacillales Paenibacillaceae Paenibacillus Paenibacillus spp.               | <b>OTU359</b> | 0.05  | 0.08 | 0.02 | 0.00 | 2.676 | 0.0495 |
| w                        | Bacilli Bacillales Planococcaceae Sporosarcina                                     | <b>OTU393</b> | 0.02  | 0.06 | 0.01 | 0.01 | 2.891 | 0.0495 |
| v                        | Bacilli Bacillales Planococcaceae Sporosarcina S. globispora                       | <b>OTU316</b> | 0.03  | 0.07 | 0.01 | 0.01 | 2.666 | 0.0495 |
| a9                       | Clostridia Clostridiales Clostridiaceae Clostridium                                | genus         | 0.62  | 2.35 | 0.26 | 0.91 | 3.989 | 0.0495 |
| b0                       | Clostridia Clostridiales Clostridiaceae Clostridium Clostridium spp.               | <b>OTU35</b>  | 0.34  | 1.89 | 0.12 | 0.83 | 3.881 | 0.0495 |
| b1                       | Clostridia Clostridiales Clostridiaceae Clostridium                                | <b>OTU85</b>  | 0.19  | 0.40 | 0.12 | 0.08 | 3.032 | 0.0495 |
| c7                       | Clostridia Clostridiales Lachnospiraceae                                           | <b>OTU255</b> | -     | 0.23 | -    | 0.22 | 3.134 | 0.0369 |
| b9                       | Clostridia Clostridiales Lachnospiraceae Cellulosilyticum                          | <b>OTU270</b> | 0.03  | 0.11 | 0.02 | 0.06 | 2.758 | 0.0495 |
| d2                       | Clostridia Clostridiales Ruminococcaceae                                           | <b>OTU197</b> | 0.01  | 0.27 | 0.01 | 0.23 | 3.168 | 0.0463 |
| d8                       | Clostridia Clostridiales Ruminococcaceae                                           | <b>OTU383</b> | 0.02  | 0.12 | 0.02 | 0.09 | 2.831 | 0.0495 |
| e1                       | Erysipelotrichia Erysipelotrichales Erysipelotrichaceae Turicibacter               | <b>OTU711</b> | 0.01  | 0.08 | 0.00 | 0.03 | 2.871 | 0.0495 |

<sup>1</sup>Average abundances (expressed as percentages) as well as standard deviation are presented for each taxon. EXT = extensive grazing system; SEMI = semi-intensive grazing system

The bold OTUs correspond to the OTUs that contribute the most to the third principal component (PC3) of PLS-DA on Figure S1.

**Table S4.** Differentially abundant taxa on teat skin in September between EXT ( $n=3$ ) and SEMI ( $n=3$ ) systems as determined by the LDA method<sup>1</sup>.

| Notation<br>on Fig. 2B            | Taxa                                                                               | N°OTU  | Average<br>abundance |       | Standard<br>deviation |       | LDA<br>score | pval   |
|-----------------------------------|------------------------------------------------------------------------------------|--------|----------------------|-------|-----------------------|-------|--------------|--------|
|                                   |                                                                                    |        | EXT                  | SEMI  | EXT                   | SEMI  |              |        |
| <b>Taxa more abundant in EXT</b>  |                                                                                    |        |                      |       |                       |       |              |        |
|                                   | <b><i>Actinobacteria</i></b>                                                       |        |                      |       |                       |       |              |        |
| h                                 | Actinobacteria Corynebacteriales                                                   | order  | 34.5                 | 17.1  | 9.23                  | 5.22  | 4.961        | 0.0495 |
| f                                 | Actinobacteria Corynebacteriales Corynebacteriaceae                                | family | 31.9                 | 15.5  | 7.49                  | 4.75  | 5.172        | 0.0495 |
| g                                 | Actinobacteria Corynebacteriales Corynebacteriaceae Corynebacterium                | genus  | 31.9                 | 15.5  | 7.49                  | 4.75  | 4.976        | 0.0495 |
| q                                 | Actinobacteria Corynebacteriales Corynebacteriaceae Corynebacterium                | OTU260 | 0.36                 | 0.03  | 0.30                  | 0.01  | 3.309        | 0.0495 |
|                                   | Coriobacteriia Coriobacteriales Coriobacteriaceae Gordonibacter                    | OTU329 | 0.06                 | 0.01  | 0.05                  | 0.01  | 3.331        | 0.0495 |
|                                   | <b><i>Firmicutes</i></b>                                                           |        |                      |       |                       |       |              |        |
| u                                 | Clostridia Clostridiales Christensenellaceae                                       | OTU370 | 0.05                 | 0.01  | 0.03                  | 0.01  | 3.402        | 0.0495 |
| a0                                | Clostridia Clostridiales Lachnospiraceae                                           | OTU362 | 0.08                 | 0.01  | 0.06                  | 0.01  | 3.185        | 0.0495 |
| a1                                | Clostridia Clostridiales Peptostreptococcaceae Terrisporobacter                    | OTU357 | 0.07                 | <0.01 | 0.04                  | 0.00  | 3.409        | 0.0463 |
|                                   | <b><i>Proteobacteria</i></b>                                                       |        |                      |       |                       |       |              |        |
| a6                                | Alphaproteobacteria Rhizobiales Phyllobacteriaceae Aminobacter                     | OTU169 | 0.21                 | 0.05  | 0.15                  | 0.02  | 3.282        | 0.0495 |
| <b>Taxa more abundant in SEMI</b> |                                                                                    |        |                      |       |                       |       |              |        |
|                                   | <b><i>Actinobacteria</i></b>                                                       |        |                      |       |                       |       |              |        |
| e                                 | Actinobacteria Bifidobacteriales                                                   | order  | 1.55                 | 21.6  | 0.57                  | 24.89 | 4.990        | 0.0495 |
| d                                 | Actinobacteria Bifidobacteriales Bifidobacteriaceae                                | family | 1.55                 | 21.6  | 0.57                  | 24.89 | 4.983        | 0.0495 |
| c                                 | Actinobacteria Bifidobacteriales Bifidobacteriaceae Bifidobacterium                | genus  | 1.55                 | 21.6  | 0.57                  | 24.89 | 5.021        | 0.0495 |
| a                                 | Actinobacteria Bifidobacteriales Bifidobacteriaceae Bifidobacterium B.pseudolongum | OTU6   | 1.36                 | 17.5  | 0.62                  | 20.96 | 4.904        | 0.0495 |
| b                                 | Actinobacteria Bifidobacteriales Bifidobacteriaceae Bifidobacterium B.choerinum    | OTU36  | 0.07                 | 2.69  | 0.06                  | 3.28  | 4.102        | 0.0495 |
| j                                 | Actinobacteria Bifidobacteriales Bifidobacteriaceae Bifidobacterium B.merycicum    | OTU52  | 0.12                 | 1.35  | 0.13                  | 0.74  | 3.779        | 0.0495 |
| i                                 | Actinobacteria Corynebacteriales Nocardiaceae                                      | family | 0.21                 | 0.31  | 0.05                  | 0.03  | 3.073        | 0.0495 |
| k                                 | Actinobacteria Corynebacteriales Nocardiaceae Rhodococcus                          | genus  | 0.18                 | 0.30  | 0.03                  | 0.03  | 3.385        | 0.0495 |
|                                   | Actinobacteria Micrococcales Dermatophilaceae                                      | OTU281 | 0.03                 | 0.05  | 0.02                  | 0.01  | 3.380        | 0.0495 |

|                          |                                                                      |        |       |      |      |      |       |        |
|--------------------------|----------------------------------------------------------------------|--------|-------|------|------|------|-------|--------|
| l                        | Actinobacteria Micrococcales Microbacteriaceae Agreia                | OTU335 | 0.01  | 0.04 | 0.00 | 0.02 | 3.424 | 0.0495 |
|                          | Actinobacteria Micromonosporales                                     | Order  | 0.01  | 0.03 | 0.01 | 0.00 | 3.781 | 0.0495 |
| n                        | Actinobacteria Micromonosporales Micromonosporaceae                  | family | 0.01  | 0.03 | 0.01 | 0.00 | 3.683 | 0.0495 |
| m                        | Actinobacteria Micromonosporales Micromonosporaceae Micromonospora   | OTU379 | 0.01  | 0.03 | 0.01 | 0.00 | 3.810 | 0.0495 |
| p                        | Coriobacteriia Coriobacteriales Coriobacteriaceae Atopobium          | OTU75  | 0.05  | 1.15 | 0.06 | 0.78 | 3.758 | 0.0495 |
| o                        | Coriobacteriia Coriobacteriales Coriobacteriaceae Atopobium          | OTU212 | <0.01 | 0.28 | 0.00 | 0.36 | 3.445 | 0.0463 |
| <b><i>Firmicutes</i></b> |                                                                      |        |       |      |      |      |       |        |
| r                        | Bacilli Bacillales Planococcaceae                                    | OTU302 | 0.01  | 0.13 | 0.02 | 0.08 | 3.017 | 0.0495 |
| t                        | Bacilli Lactobacillales Streptococcaceae Lactococcus                 | genus  | 0.18  | 0.23 | 0.02 | 0.04 | 3.000 | 0.0495 |
| s                        | Bacilli Lactobacillales Streptococcaceae Lactococcus Lc. lactis      | OTU1   | 0.18  | 0.21 | 0.01 | 0.02 | 3.566 | 0.0495 |
| x                        | Clostridia Clostridiales Clostridiaceae Clostridium                  | genus  | 0.49  | 1.18 | 0.23 | 0.55 | 3.581 | 0.0495 |
| y                        | Clostridia Clostridiales Clostridiaceae Clostridium spp.             | OTU35  | 0.26  | 0.72 | 0.01 | 0.05 | 3.369 | 0.0495 |
| w                        | Clostridia Clostridiales Clostridiaceae Clostridium C. hylemonae     | OTU271 | 0.01  | 0.07 | -    | 0.09 | 3.284 | 0.0495 |
| v                        | Clostridia Clostridiales Clostridiaceae Clostridium C. chartababidum | OTU321 | -     | 0.11 | 0.23 | 0.55 | 2.996 | 0.0369 |
| z                        | Clostridia Clostridiales Lachnospiraceae Coproccoccus                | OTU248 | -     | 0.02 | -    | 0.03 | 3.260 | 0.0369 |
| a2                       | Clostridia Clostridiales Ruminococcaceae                             | OTU197 | -     | 0.04 | -    | 0.03 | 3.217 | 0.0463 |
| a3                       | Clostridia Clostridiales Ruminococcaceae Ruminococcus                | OTU216 | 0.01  | 0.28 | 0.01 | 0.20 | 3.188 | 0.0495 |
| a4                       | Clostridia Clostridiales Ruminococcaceae Ruminococcus                | OTU322 | 0.01  | 0.08 | 0.00 | 0.05 | 3.666 | 0.0495 |
| a5                       | Clostridia Clostridiales Ruminococcaceae Ruminococcus                | OTU334 | 0.02  | 0.11 | 0.01 | 0.11 | 3.131 | 0.0495 |

<sup>1</sup>Average abundances (expressed as percentages) as well as standard deviation are presented for each taxon. EXT = extensive grazing system; SEMI = semi-intensive grazing system

**Table S5.** Differentially abundant taxa in raw milk **(A)** in July and **(B)** in September between EXT ( $n=3$ ) and SEMI ( $n=3$ ) systems as determined by the LDA method<sup>1</sup>.

**A**

| Taxa                                     | Average abundance |      | Standard deviation |      | LDA score | pval   |
|------------------------------------------|-------------------|------|--------------------|------|-----------|--------|
|                                          | EXT               | SEMI | EXT                | SEMI |           |        |
| <b>Taxa more abundant in EXT</b>         |                   |      |                    |      |           |        |
| <i>Firmicutes</i>                        |                   |      |                    |      |           |        |
| Clostridia Clostridiales Lachnospiraceae | 0.33              | 0.06 | 0.19               | 0.06 | 3.546     | 0.0495 |
| <i>Proteobacteria</i>                    |                   |      |                    |      |           |        |
| Gammaproteobacteria                      | 3.48              | 0.14 | 2.98               | 0.08 | 4.308     | 0.0495 |
| Gammaproteobacteria Pseudomonadales      | 3.09              | 0.01 | 2.47               | 0.02 | 4.234     | 0.0463 |

**B**

| Taxa                                                                              | Average abundance |      | Standard deviation |      | LDA score | pval   |
|-----------------------------------------------------------------------------------|-------------------|------|--------------------|------|-----------|--------|
|                                                                                   | EXT               | SEMI | EXT                | SEMI |           |        |
| <b>Taxa more abundant in EXT</b>                                                  |                   |      |                    |      |           |        |
| <i>Actinobacteria</i>                                                             |                   |      |                    |      |           |        |
| Actinobacteria Corynebacteriales Nocardiaceae Rhodococcus Rhodococcus spp._otu100 | 3.26              | 0.82 | 1.07               | 1.32 | 4.209     | 0.0495 |
| Actinobacteria Micrococcales Micrococcaceae Kocuria Kocuria spp._otu72            | 0.09              | -    | 0.12               | -    | 4.131     | 0.0339 |
| <b>Taxa more abundant in SEMI</b>                                                 |                   |      |                    |      |           |        |
| <i>Firmicutes</i>                                                                 |                   |      |                    |      |           |        |
| Clostridia Clostridiales Lachnospiraceae                                          | 0.05              | 0.46 | 0.05               | 0.33 | 3.841     | 0.0463 |
| Clostridia Clostridiales Lachnospiraceae_otu203                                   | -                 | 0.29 | -                  | 0.28 | 3.888     | 0.0369 |

<sup>1</sup>Average abundances (expressed as percentages) as well as standard deviation are presented for each taxon. EXT = extensive grazing system; SEMI = semi-intensive grazing system

**Table S6.** Differentially abundant taxa in cheese core **(A)** in July and **(B)** in September between EXT ( $n=3$ ) and SEMI ( $n=3$ ) systems as determined by the LDA method<sup>1</sup>.

**A**

| Taxa                                                                             | Average abundance |      | Standard deviation |      | LDA score | pval   |
|----------------------------------------------------------------------------------|-------------------|------|--------------------|------|-----------|--------|
|                                                                                  | EXT               | SEMI | EXT                | SEMI |           |        |
| <b>Taxa more abundant in EXT</b>                                                 |                   |      |                    |      |           |        |
| <i>Firmicutes</i>                                                                |                   |      |                    |      |           |        |
| Bacilli Lactobacillales Lactobacillaceae                                         | 1.52              | 0.66 | 0.83               | 0.32 | 4.028     | 0.0495 |
| Bacilli Lactobacillales Lactobacillaceae Lactobacillus Lb. helveticus_otu27      | 0.62              | 0.09 | 0.42               | 0.07 | 3.436     | 0.0495 |
| Bacilli Lactobacillales Lactobacillaceae Lactobacillus Lb. parabuchneri_otu57    | 0.11              | 0.04 | 0.02               | 0.03 | 2.977     | 0.0495 |
| Bacilli Lactobacillales Lactobacillaceae Lactobacillus Lactobacillus spp._otu180 | 0.04              | 0.01 | 0.02               | 0.00 | 2.845     | 0.0495 |
| Bacilli Lactobacillales Lactobacillaceae Lactobacillus Lb. helveticus_otu229     | 0.06              | 0.01 | 0.05               | 0.01 | 2.524     | 0.0495 |
| <b>Taxa more abundant in SEMI</b>                                                |                   |      |                    |      |           |        |
| <i>Fusobacteria</i>                                                              |                   |      |                    |      |           |        |
| Fusobacteriia Fusobacteriales Fusobacteriaceae Fusobacterium_otu223              | 0.03              | 0.16 | 0.03               | 0.09 | 2.999     | 0.0495 |

**B**

| Taxa                                                                                       | Average abundance |      | Standard deviation |      | LDA score | pval   |
|--------------------------------------------------------------------------------------------|-------------------|------|--------------------|------|-----------|--------|
|                                                                                            | EXT               | SEMI | EXT                | SEMI |           |        |
| <b>Taxa more abundant in EXT</b>                                                           |                   |      |                    |      |           |        |
| <i>Proteobacteria</i>                                                                      |                   |      |                    |      |           |        |
| Gammaproteobacteria Enterobacteriales                                                      | 0.13              | -    | 0.18               | -    | 2.914     | 0.0369 |
| Gammaproteobacteria Enterobacteriales Enterobacteriaceae                                   | 0.13              | -    | 0.18               | -    | 2.905     | 0.0369 |
| Gammaproteobacteria Pseudomonadales Pseudomonadaceae Pseudomonas Ps. putida_otu326         | 0.02              | -    | 0.02               | -    | 2.185     | 0.0369 |
| <b>Taxa more abundant in SEMI</b>                                                          |                   |      |                    |      |           |        |
| <i>Firmicutes</i>                                                                          |                   |      |                    |      |           |        |
| Bacilli Lactobacillales Lactobacillaceae Lactobacillus Lb. curvatus_otu315                 | -                 | 0.02 | -                  | 0.01 | 2.407     | 0.0339 |
| Bacilli Lactobacillales Streptococcaceae Streptococcus                                     | 0.03              | 0.11 | 0.02               | 0.03 | 2.627     | 0.0495 |
| Bacilli Lactobacillales Streptococcaceae Lactococcus Lc. lactis_otu46                      | 0.09              | 0.36 | 0.07               | 0.08 | 3.153     | 0.0495 |
| Bacilli Lactobacillales Streptococcaceae Lactococcus_otu139                                | 0.02              | 0.07 | 0.01               | 0.03 | 2.440     | 0.0495 |
| Bacilli Lactobacillales Streptococcaceae Lactococcus_otu175                                | 0.02              | 0.06 | 0.01               | 0.03 | 2.307     | 0.0495 |
| Bacilli Lactobacillales Streptococcaceae Lactococcus Lc. chungangensis/raffinolactis_otu48 | 0.07              | 0.30 | 0.06               | 0.09 | 3.048     | 0.0495 |
| Bacilli Lactobacillales Streptococcaceae Lactococcus_otu89                                 | 0.06              | 0.23 | 0.05               | 0.03 | 2.922     | 0.0495 |

<sup>1</sup>Average abundances (expressed as percentages) as well as standard deviation are presented for each taxon. EXT = extensive grazing system; SEMI = semi-intensive grazing system

**Table S7.** Differentially abundant taxa in cheese rind **(A)** in July and **(B)** in September between EXT ( $n=3$ ) and SEMI ( $n=3$ ) systems as determined by the LDA method<sup>1</sup>.

**A**

| Taxa                                                                                       | Average abundance |      | Standard deviation |      | LDA score | pval   |
|--------------------------------------------------------------------------------------------|-------------------|------|--------------------|------|-----------|--------|
|                                                                                            | EXT               | SEMI | EXT                | SEMI |           |        |
| <b>Taxa more abundant in EXT</b>                                                           |                   |      |                    |      |           |        |
| <i>Firmicutes</i>                                                                          |                   |      |                    |      |           |        |
| Bacilli Lactobacillales Lactobacillaceae Lactobacillus Lb. helveticus_otu27                | 0.72              | 0.16 | 0.49               | 0.02 | 3.499     | 0.0495 |
| Bacilli Lactobacillales Lactobacillaceae Lactobacillus Lb. helveticus_otu229               | 0.05              | 0.01 | 0.04               | 0.01 | 2.536     | 0.0495 |
| <b>Taxa more abundant in SEMI</b>                                                          |                   |      |                    |      |           |        |
| <i>Bacteroidetes</i>                                                                       |                   |      |                    |      |           |        |
| Flavobacteriia Flavobacteriales Flavobacteriaceae Chryseobacterium spp._otu372             | -                 | 0.02 | -                  | 0.01 | 2.649     | 0.0495 |
| <i>Firmicutes</i>                                                                          |                   |      |                    |      |           |        |
| Bacilli Lactobacillales Streptococcaceae Lactococcus Lc. lactis_otu214                     | -                 | 0.01 | -                  | 0.01 | 2.770     | 0.0495 |
| Bacilli Lactobacillales Streptococcaceae Lactococcus Lc. chungangensis/raffinolactis_otu48 | 0.06              | 0.18 | 0.01               | 0.04 | 2.878     | 0.0495 |

**B**

| Taxa                                                                                       | Average abundance |       | Standard deviation |       | LDA score | pval   |
|--------------------------------------------------------------------------------------------|-------------------|-------|--------------------|-------|-----------|--------|
|                                                                                            | EXT               | SEMI  | EXT                | SEMI  |           |        |
| <b>Taxa more abundant in EXT</b>                                                           |                   |       |                    |       |           |        |
| <i>Proteobacteria</i>                                                                      |                   |       |                    |       |           |        |
| Gammaproteobacteria Enterobacteriales Enterobacteriaceae Escherichia E. coli_otu90         | 0.15              | 0.004 | 0.25               | 0.002 | 2.958     | 0.0495 |
| <b>Taxa more abundant in SEMI</b>                                                          |                   |       |                    |       |           |        |
| <i>Actinobacteria</i>                                                                      |                   |       |                    |       |           |        |
| Actinobacteria Micrococcales Brevibacteriaceae Brevibacterium_otu94                        | 0.26              | 0.41  | 0.06               | 0.06  | 2.969     | 0.0495 |
| <i>Firmicutes</i>                                                                          |                   |       |                    |       |           |        |
| Bacilli Lactobacillales Streptococcaceae Lactococcus Lc. lactis_otu46                      | 0.07              | 0.23  | 0.05               | 0.09  | 2.924     | 0.0495 |
| Bacilli Lactobacillales Streptococcaceae Lactococcus Lc. chungangensis/raffinolactis_otu48 | 0.06              | 0.31  | 0.05               | 0.14  | 3.135     | 0.0495 |
| Bacilli Lactobacillales Streptococcaceae Lactococcus_otu89                                 | 0.04              | 0.21  | 0.03               | 0.08  | 3.006     | 0.0495 |

<sup>1</sup>Average abundances (expressed as percentages) as well as standard deviation are presented for each taxon. EXT = extensive grazing system; SEMI = semi-intensive grazing system

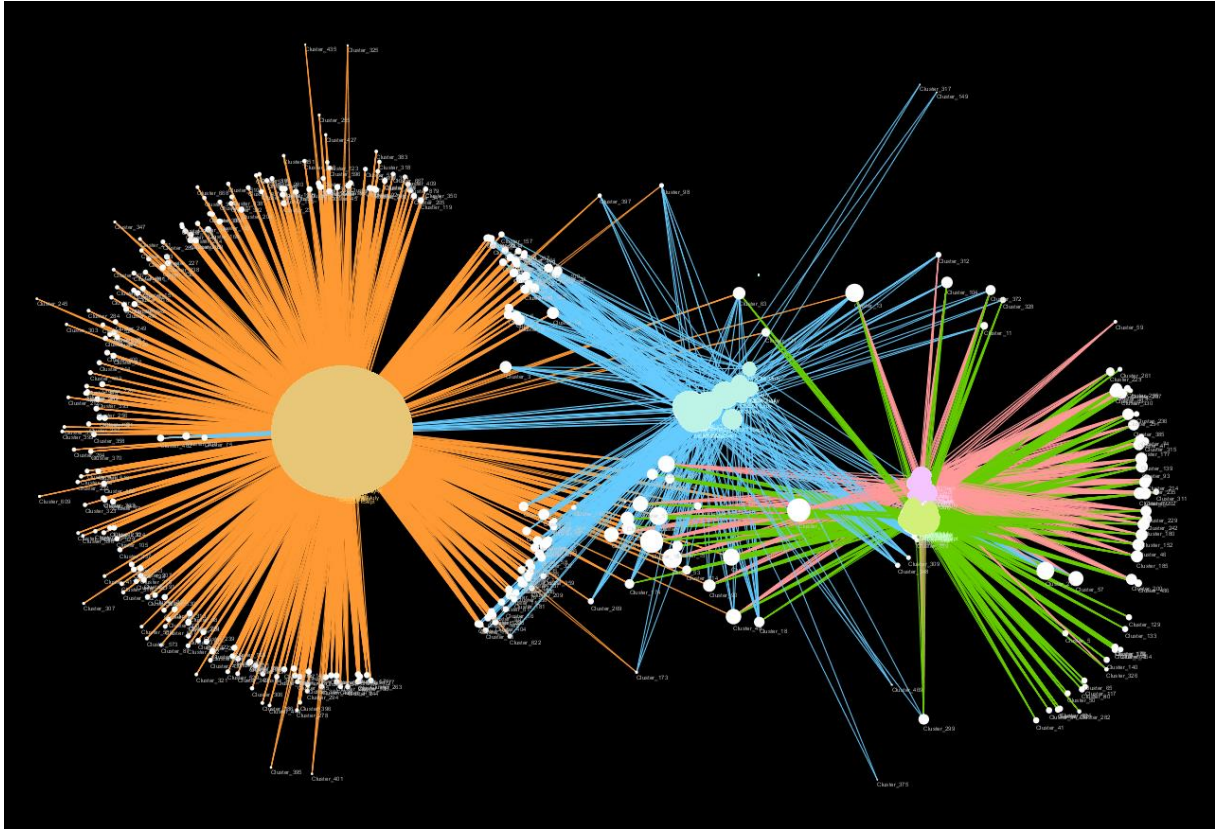

**Figure S3.** Network analysis from teat skin to ripened cheeses. The teat skin samples were coloured in orange, raw milk samples in blue, cheese core samples in pink, and cheese rind samples in green. The white nodes correspond to OTUs. The node size is proportional to the number of the edges (lines connecting the nodes). The OTUs detected in at least two samples of the same habitat were conserved.

**Table S8.** Average relative abundance (%) of 133 OTUs present in at least two habitats. The 9 OTUs detected in all habitats were framed.



| Taxa                                                | N°otu  | Teat skin<br>(n=12) | Milk<br>(n=12) | Core<br>(n=12) | Rind<br>(n=12) |
|-----------------------------------------------------|--------|---------------------|----------------|----------------|----------------|
| <b>Actinobacteria</b>                               |        |                     |                |                |                |
| <i>Brevibacterium linens</i>                        | OTU4   | 0.01                | 0.06           | 0.02           | 12.8           |
| <i>Bifidobacterium pseudolongum</i>                 | OTU6   | 7.31                | 0.38           |                |                |
| <i>Corynebacterium marinum</i>                      | OTU8   | 5.87                | 1.58           |                |                |
| <i>Brevibacterium linens</i>                        | OTU11  |                     | 0.05           |                | 1.87           |
| <i>Corynebacterium</i> spp.                         | OTU12  | 3.62                | 0.83           |                |                |
| <i>Brachybacterium paraconglomeratum/sacelli</i>    | OTU15  | 0.01                | 0.04           |                | 1.22           |
| <i>Corynebacterium</i>                              | OTU17  | 1.70                | 1.01           |                |                |
| <i>Bifidobacterium crudilactis/psychraerophilum</i> | OTU18  |                     | 10.7           |                | 0.01           |
| <i>Dietzia maris</i>                                | OTU19  | 1.34                | 0.85           |                |                |
| <i>Corynebacterium callunae</i>                     | OTU20  | 1.37                | 0.86           |                |                |
| <i>Corynebacterium camporealensis</i>               | OTU21  | 1.36                | 0.11           |                |                |
| <i>Corynebacterium</i> spp.                         | OTU22  | 1.28                | 0.24           |                |                |
| <i>Corynebacterium glutamicum</i>                   | OTU25  | 1.12                | 0.16           |                |                |
| <i>Corynebacterium humireducens</i>                 | OTU32  | 0.84                | 0.38           |                |                |
| <i>Rhodococcus</i> spp.                             | OTU33  | 0.04                | 6.10           |                |                |
| <i>Bifidobacterium choerinum</i>                    | OTU36  | 0.78                | 0.06           |                |                |
| <i>Brevibacterium</i>                               | OTU42  | 0.07                |                |                | 0.51           |
| <i>Brachybacterium sacelli</i>                      | OTU44  | 0.03                |                |                | 0.30           |
| <i>Bifidobacterium merycicum</i>                    | OTU52  | 0.44                | 0.3            |                |                |
| <i>Yaniella halotolerans</i>                        | OTU54  | 0.01                |                |                | 0.24           |
| <i>Nocardioides</i>                                 | OTU55  | 0.51                | 0.03           |                |                |
| <i>Corynebacterium</i>                              | OTU56  | 0.61                | 0.03           |                |                |
| <i>Pseudoclavibacter helvolus</i>                   | OTU58  | 0.35                | 0.31           |                |                |
| <i>Arthrobacter</i> spp.                            | OTU66  | 0.36                | 0.14           |                |                |
| <i>Kocuria</i> spp.                                 | OTU72  | 0.33                | 0.03           |                |                |
| <i>Atopobium</i>                                    | OTU75  | 0.34                | 0.02           |                |                |
| <i>Corynebacterium lactis</i>                       | OTU76  | 0.63                | 0.02           |                |                |
| <i>Micrococcus luteus/terreus</i>                   | OTU78  | 0.39                | 0.12           |                |                |
| <i>Micrococcus</i>                                  | OTU79  | 0.29                | 0.01           |                |                |
| <i>Tetrasphaera</i>                                 | OTU91  | 0.29                | 0.02           |                |                |
| <i>Dietzia lutea</i>                                | OTU99  | 0.25                | 0.02           |                |                |
| <i>Rhodococcus</i> spp.                             | OTU100 | 0.02                | 2.25           |                |                |
| <i>Atopobium</i>                                    | OTU112 | 0.38                | 0.02           |                |                |
| <i>Nocardioides solisilvae</i>                      | OTU120 | 0.27                | 0.02           |                |                |
| <i>Atopobium</i>                                    | OTU124 | 0.27                | 0.02           |                |                |
| <i>Dietzia cercidiphylli</i>                        | OTU127 | 0.01                | 0.01           |                | 0.09           |
| <i>Atopobium</i>                                    | OTU130 | 0.27                | 0.01           |                |                |
| <i>Corynebacterium</i>                              | OTU137 | 0.17                | 0.02           |                |                |
| <i>Janibacter</i> spp.                              | OTU153 | 0.22                | 0.07           |                | 0.02           |
| <i>Nocardioides daphniae</i>                        | OTU157 | 0.13                | 0.07           |                |                |
| <i>Kocuria rhizophila/salsicia</i>                  | OTU174 | 0.01                | 0.64           |                | 0.01           |
| <i>Micrococcus</i> spp.                             | OTU234 | 0.09                | 0.04           |                |                |



|                                                |        |      |      |      |      |
|------------------------------------------------|--------|------|------|------|------|
| <i>Corynebacterium bovis</i>                   | OTU269 | 0.02 | 0.3  |      |      |
| <i>Corynebacterium variabile</i>               | OTU328 |      | 0.04 |      | 0.02 |
| <i>Agreia</i>                                  | OTU335 | 0.05 | 0.07 |      |      |
| <i>Rhodococcus</i> spp.                        | OTU397 | 0.01 | 0.21 |      |      |
| <i>Leucobacter</i> spp.                        | OTU404 | 0.10 | 0.16 |      |      |
| <b>Bacteroidetes</b>                           |        |      |      |      |      |
| <i>Chryseobacterium</i> spp.                   | OTU372 |      | 0.25 | 0.01 | 0.01 |
| <b>Firmicutes</b>                              |        |      |      |      |      |
| <i>Lactococcus lactis</i>                      | OTU1   | 0.23 | 11.6 | 97.4 | 69.7 |
| <i>Romboutsia</i>                              | OTU3   | 14.6 | 1.85 |      |      |
| <i>Intestinibacter</i>                         | OTU7   | 6.42 | 0.87 |      |      |
| <i>Turicibacter</i>                            | OTU9   | 5.59 | 1.53 |      |      |
| <i>Peptoclostridium</i>                        | OTU10  | 5.58 | 0.30 |      |      |
| <i>Lactobacillus casei/paracasei</i>           | OTU13  | 0.01 | 6.61 | 0.42 | 0.60 |
| <i>Staphylococcus haemolyticus/petrasii</i>    | OTU16  | 2.37 | 0.80 | 0.10 | 0.25 |
| <i>Bacillus</i> spp.                           | OTU24  | 0.02 | 6.71 |      |      |
| <i>Aerococcus urinaeequi/viridans</i>          | OTU26  | 1.21 | 0.04 |      |      |
| <i>Lactobacillus helveticus</i>                | OTU27  |      | 3.45 | 0.23 | 0.27 |
| <i>Bacillus</i>                                | OTU29  | 1.03 | 0.09 |      |      |
| <i>Jeotgalicoccus</i> spp.                     | OTU34  | 1.39 | 0.04 |      | 0.08 |
| <i>Clostridium</i> spp.                        | OTU35  | 0.80 | 0.04 |      |      |
| <i>Acetitomaculum</i>                          | OTU37  | 0.73 | 0.05 |      |      |
| <i>Lactococcus lactis</i>                      | OTU39  |      |      | 0.42 | 0.21 |
| <i>Lactococcus lactis</i>                      | OTU46  |      |      | 0.16 | 0.11 |
| <i>Lactococcus chungangensis/raffinolactis</i> | OTU48  | 0.01 | 0.06 | 0.12 | 0.15 |
| <i>Macrococcus caseolyticus</i>                | OTU51  | 0.29 | 0.25 | 0.06 | 0.10 |
| <i>Streptococcus porcinus/uberis</i>           | OTU53  | 0.04 | 4.04 | 0.03 | 0.06 |
| <i>Lactobacillus parabuchneri</i>              | OTU57  |      | 0.16 | 0.06 | 0.27 |
| <i>Proteiniclasticum</i>                       | OTU60  | 0.52 | 0.07 |      |      |
| <i>Aerococcaceae</i>                           | OTU62  | 0.72 | 0.01 |      |      |
| <i>Enterococcus</i> spp.                       | OTU63  | 0.02 | 0.48 |      | 0.11 |
| <i>Staphylococcus chromogenes</i>              | OTU67  | 0.36 | 0.40 | 0.01 |      |
| <i>Streptococcus dysgalactiae</i>              | OTU81  | 0.12 | 0.26 | 0.02 | 0.03 |
| <i>Clostridium</i>                             | OTU85  | 0.27 | 0.04 |      |      |
| <i>Lachnospiraceae</i>                         | OTU88  | 0.24 | 0.03 |      |      |
| <i>Lactococcus</i>                             | OTU89  |      |      | 0.10 | 0.09 |
| <i>Lactococcus lactis</i>                      | OTU93  |      |      | 0.11 | 0.04 |
| <i>Turicibacter sanguinis</i>                  | OTU95  | 0.23 | 0.01 |      |      |
| <i>Facklamia</i>                               | OTU96  | 0.29 | 0.02 |      |      |
| <i>Staphylococcus equorum</i>                  | OTU114 | 0.02 | 0.01 |      | 0.11 |
| <i>Ruminococcaceae</i>                         | OTU122 | 0.44 | 0.21 |      |      |
| <i>Marvinbryantia</i>                          | OTU132 | 0.30 |      |      |      |
| <i>Mogibacterium</i>                           | OTU135 | 0.22 | 0.09 |      |      |
| <i>Lactococcus</i>                             | OTU139 |      |      | 0.04 | 0.03 |
| <i>Christensenellaceae</i>                     | OTU146 | 0.29 | 0.01 |      |      |
| <i>Lactococcus</i>                             | OTU152 |      |      | 0.07 | 0.05 |
| <i>Lachnospiraceae</i>                         | OTU156 | 0.10 | 0.04 |      |      |
| <i>Christensenellaceae</i>                     | OTU164 | 0.11 | 0.04 |      |      |
| <i>Lactococcus</i>                             | OTU175 |      |      | 0.04 | 0.04 |
| <i>Lactobacillus brevis</i>                    | OTU177 |      |      | 0.02 | 0.03 |

|                                        |              |             |             |             |             |
|----------------------------------------|--------------|-------------|-------------|-------------|-------------|
| <i>Lactobacillus</i> spp.              | OTU180       |             |             | 0.02        | 0.03        |
| <i>Lachnospiraceae</i>                 | OTU181       | 0.15        | 0.01        |             |             |
| <i>Lactococcus</i>                     | OTU185       |             |             | 0.07        | 0.06        |
| <i>Ruminococcaceae</i>                 | OTU186       | 0.18        | 0.01        |             |             |
| <i>Ruminococcaceae</i>                 | OTU197       | 0.08        | 0.13        |             |             |
| <i>Lactococcus lactis</i>              | OTU200       |             |             | 0.03        | 0.02        |
| <i>Lactobacillus</i> spp.              | OTU202       |             |             | 0.03        | 0.03        |
| <i>Lachnospiraceae</i>                 | OTU203       | 0.20        | 0.07        |             |             |
| <i>Ruminococcaceae</i>                 | OTU206       | 0.15        | 0.02        |             |             |
| <i>Streptococcus pluranimalium</i>     | OTU209       | 0.06        | 0.32        |             |             |
| <i>Lactococcus lactis</i>              | OTU214       |             |             | 0.02        | 0.01        |
| <i>Lactobacillus helveticus</i>        | OTU229       |             |             | 0.02        | 0.02        |
| <i>Lactobacillus</i> spp.              | OTU235       |             |             | 0.02        | 0.02        |
| <i>Lactococcus</i>                     | OTU242       |             |             | 0.01        | 0.01        |
| <i>Lactobacillus parabuchneri</i>      | OTU251       |             |             | 0.01        | 0.04        |
| <i>Christensenellaceae</i>             | OTU258       | 0.12        | 0.10        |             |             |
| <i>Planomicrobium</i>                  | OTU295       |             |             | 0.02        | 0.01        |
| <i>Macrococcus caseolyticus</i>        | OTU311       |             |             | 0.02        | 0.02        |
| <i>Lactobacillus curvatus</i>          | OTU315       |             |             | 0.01        | 0.01        |
| <i>Lachnospiraceae</i>                 | OTU327       | 0.06        | 0.02        |             |             |
| <i>Streptococcus</i>                   | OTU330       |             |             | 0.02        | 0.01        |
| <i>Ruminococcaceae</i>                 | OTU339       | 0.06        | 0.06        |             |             |
| <i>Paenibacillus</i> spp.              | OTU359       | 0.04        | 0.03        |             |             |
| <i>Lactococcus lactis</i>              | OTU385       |             |             | 0.02        | 0.01        |
| <i>Christensenellaceae</i>             | OTU402       | 0.07        |             |             |             |
| <i>Fastidiosipila</i>                  | OTU417       | 0.03        |             | 0.01        | 0.01        |
| <b>Fusobacteria</b>                    |              |             |             |             |             |
| <i>Fusobacterium</i>                   | OTU223       |             |             | 0.05        | 0.01        |
| <b>Proteobacteria</b>                  |              |             |             |             |             |
| <i>Sphingomonas</i> spp.               | OTU14        | 0.24        | 19.6        |             |             |
| <i>Paracoccus chinensis</i>            | OTU61        | 0.67        | 0.16        |             |             |
| <b><i>Escherichia coli</i></b>         | <b>OTU90</b> | <b>0.01</b> | <b>0.01</b> | <b>0.05</b> | <b>0.07</b> |
| <i>Cupriavidus gilardii</i>            | OTU98        | 0.01        | 1.43        |             |             |
| <i>Sphingomonas</i> spp.               | OTU101       | 0.20        | 0.41        |             |             |
| <i>Brevundimonas</i> spp.              | OTU103       | 0.02        | 1.11        |             |             |
| <i>Pseudomonas</i> spp.                | OTU104       |             | 0.73        | 0.01        | 0.04        |
| <i>Paracoccus</i> spp.                 | OTU107       | 0.36        | 0.01        |             |             |
| <i>Sphingomonadaceae changbaiensis</i> | OTU173       | 0.01        | 0.58        |             |             |
| <i>Bradyrhizobium</i> spp.             | OTU267       | 0.04        | 0.11        |             |             |
| <i>Rhizobium</i>                       | OTU288       | 0.08        | 0.04        |             |             |
| <i>Acinetobacter guillouiae</i>        | OTU299       |             | 0.06        | 0.01        | 0.01        |
| <i>Acinetobacter</i>                   | OTU312       |             | 0.31        | 0.02        |             |
| <i>Pseudomonas putida</i>              | OTU326       |             |             | 0.01        | 0.02        |
| <i>Enterobacteriaceae</i>              | OTU486       |             |             | 0.01        | 0.02        |
| <i>Bosea</i>                           | OTU622       | 0.02        | 0.04        |             |             |

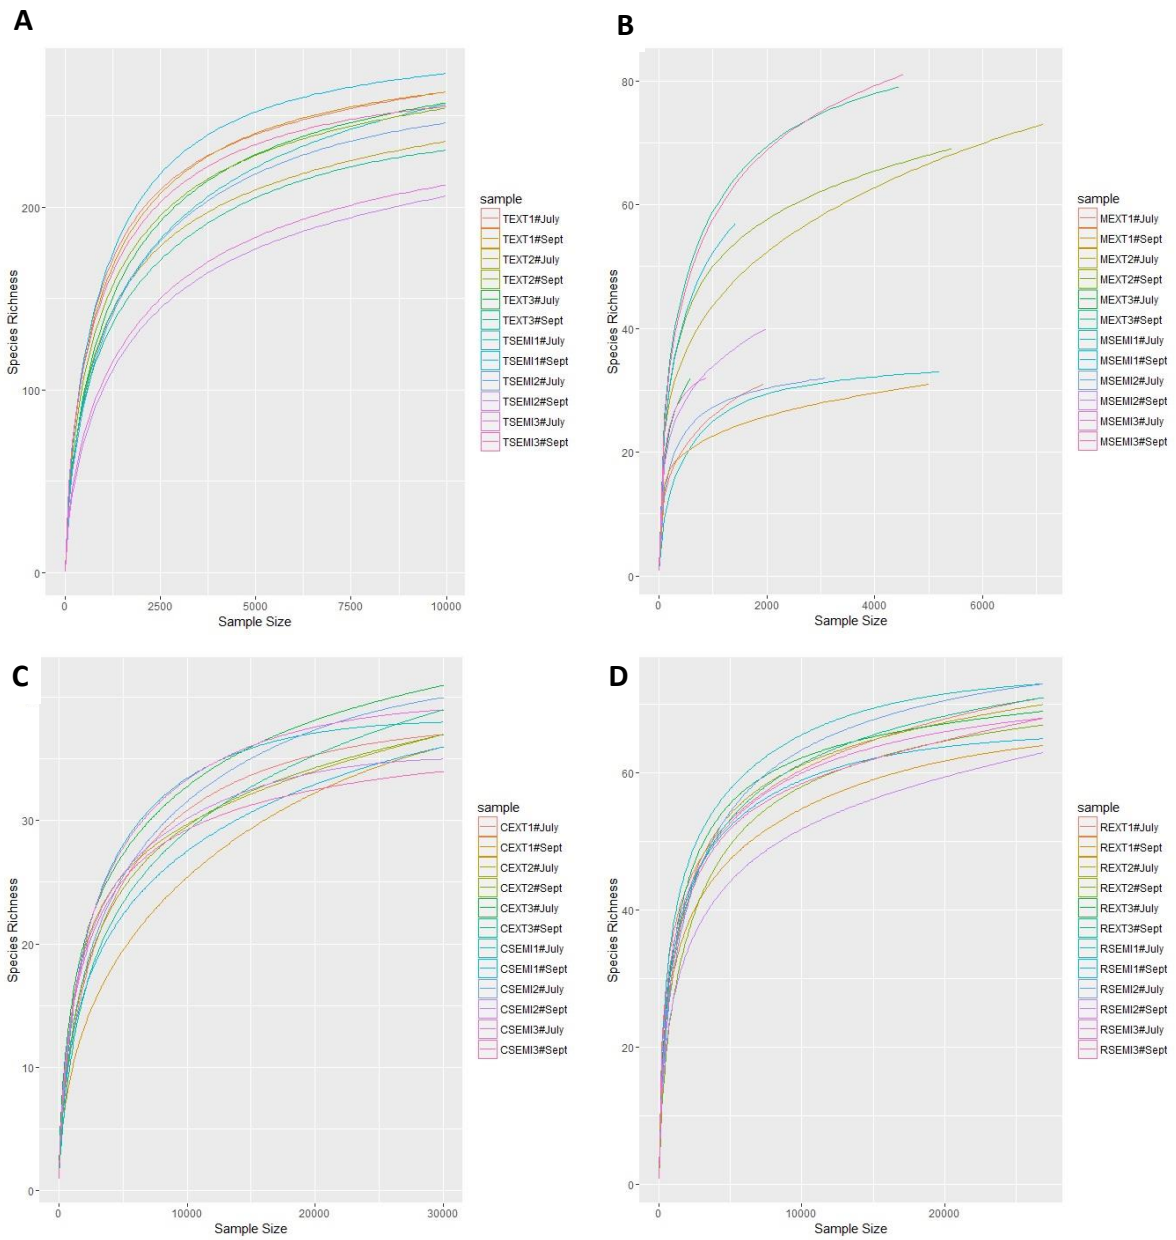

**Figure S4.** Rarefaction curves from the V3-V4 region of the 16S rRNA from teat skin (A), raw milk (B), cheese core (C), and cheese rind (D) samples.
